# Supplementary material for: Mesoporous Carbons and Highly Cross-Linking Polymers for Removal of Cationic Dyes from Aqueous Solutions—Studies on Adsorption Equilibrium and Kinetics
Source: MDPI journal article supplement (doi:10.3390/ma17061374), 2024-03-17
Supplement: s1 [file s1]

Article

# Mesoporous Carbons and Highly Cross-linking Polymers for Removal of Cationic Dyes from Aqueous Solutions—Studies on Adsorption Equilibrium and Kinetics

Malgorzata Zienkiewicz-Strzalka, Magdalena Blachnio, Anna Derylo-Marczewska \*, Szymon Winter and Malgorzata Maciejewska

Faculty of Chemistry, Maria Curie-Skłodowska University, M. Curie-Skłodowska Sq. 3, 20-031 Lublin, Poland; malgorzata.zienkiewicz-strzalka@mail.umcs.pl (M.Z.-S.); magdalena.blachnio@mail.umcs.pl (M.B.); szymonwinter123@wp.pl (S.W.); mmacieje@umcs.pl (M.M.)

\* Correspondence: anna.derylo-marczewska@mail.umcs.pl; Tel.: +48-8153-755-49

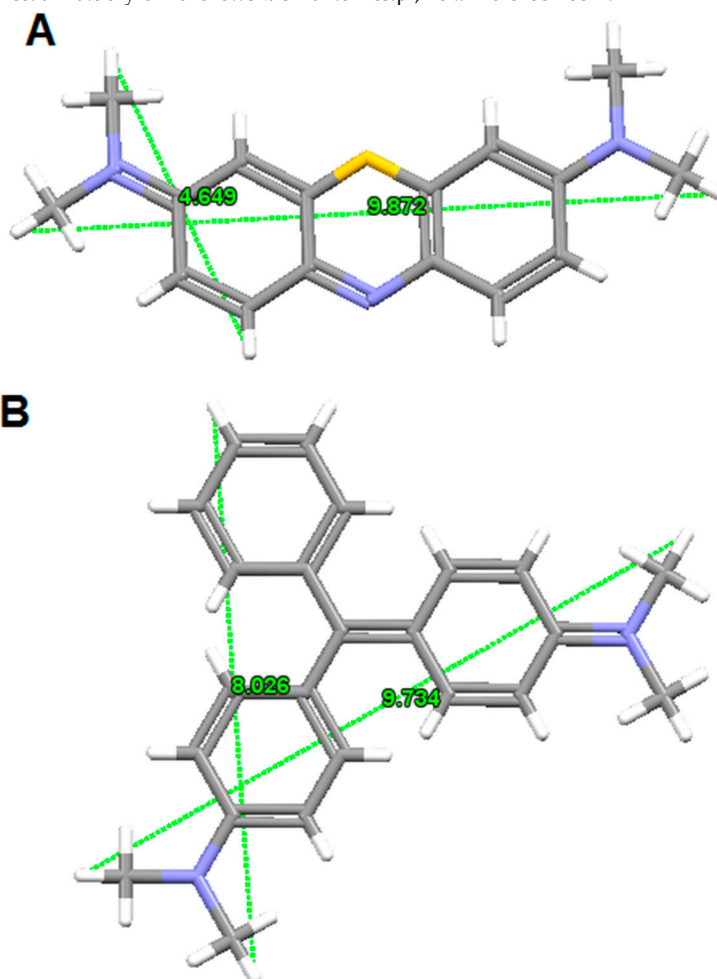

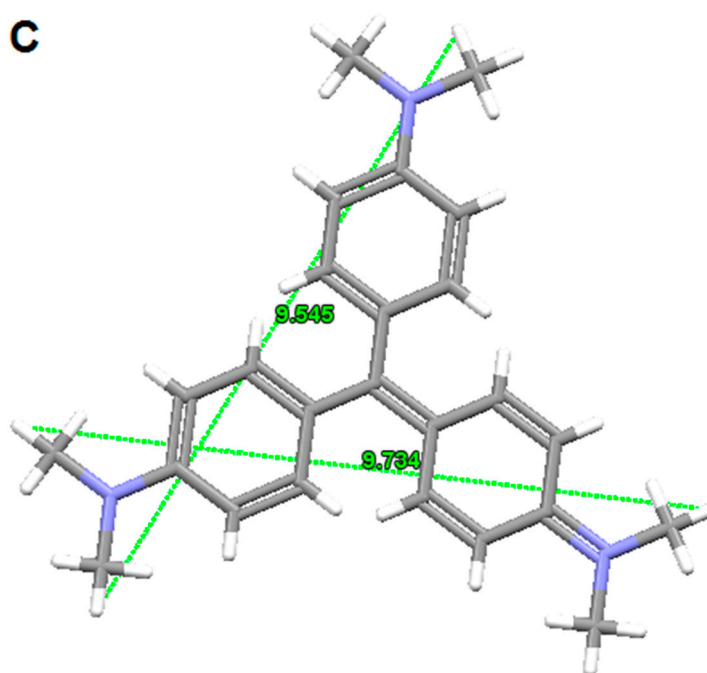

**Figure S1.** Distance between the most remote atoms in a molecule of (A) methylene blue, (B) malachite green, and (C) crystal violet measured by means of Mercury 3.7 (Build RC1) tools.

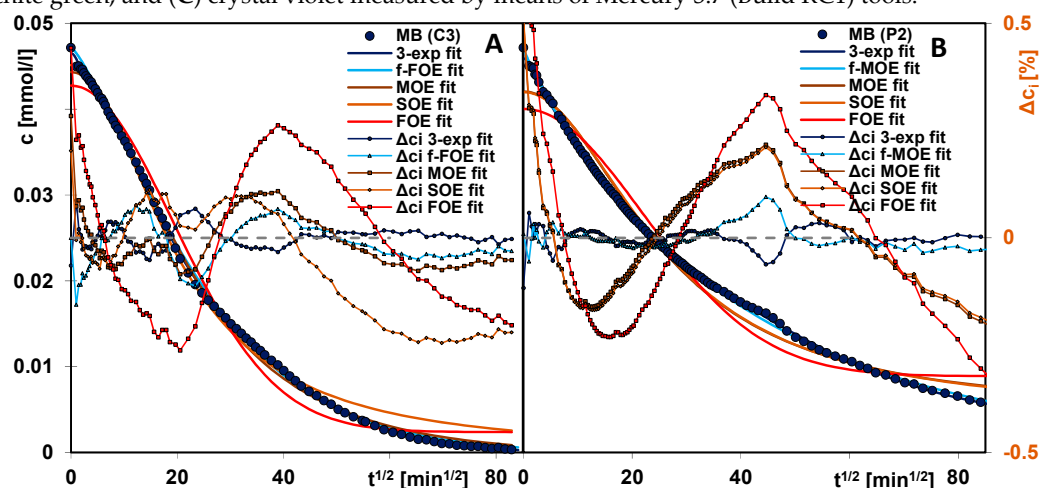

**Figure S2.** Comparison of fitting quality by using the FOE, SOE, MOE, m-exponential, and f-MOE equations for a description of kinetic data for the MB (C3) system (A) and the MB (P2) system (B).

**Table S1.** Comparison of the parameters of various kinetic equations.

| Adsorption system | fit   | fz/p   | log k <sup>1</sup> | t <sub>0.5</sub> [min] <sup>2</sup> | u <sub>eq</sub> | SD(c/c <sub>0</sub> ) [%] | 1-R <sup>2</sup>      |
|-------------------|-------|--------|--------------------|-------------------------------------|-----------------|---------------------------|-----------------------|
| MB (C3)           | FOE   | 0      | -2.87              | 513                                 | 0.94            | 3.63                      | 1.09·10 <sup>-2</sup> |
|                   | SOE   | 1      | -2.61              | 412                                 | 1               | 2.75                      | 6.68·10 <sup>-3</sup> |
|                   | MOE   | 0.84   | -3.49              | 469                                 | 1               | 1.42                      | 1.6·10 <sup>-3</sup>  |
|                   | m-exp | --     | -2.78              | 416                                 | 1               | 0.57                      | 2.53·10 <sup>-4</sup> |
|                   | f-FOE | 0/0.65 | -2.87              | 420                                 | 1               | 1.12                      | 1.03·10 <sup>-3</sup> |
| MB (C4)           | FOE   | 0      | -2.24              | 121                                 | 1               | 1.91                      | 4.04·10 <sup>-3</sup> |
|                   | SOE   | 1      | -1.92              | 84                                  | 1               | 5.93                      | 4.75·10 <sup>-2</sup> |
|                   | MOE   | 0.13   | -2.28              | 119                                 | 1               | 1.88                      | 3.92·10 <sup>-4</sup> |

|         |       |            |       |      |      |      |                      |
|---------|-------|------------|-------|------|------|------|----------------------|
|         | m-exp | --         | -2.16 | 99   | 1    | 0.74 | $5.86 \cdot 10^{-3}$ |
|         | f-MOE | -1/0.77    | -2.00 | 114  | 1    | 1.57 | $2.62 \cdot 10^{-3}$ |
| MB (P1) | FOE   | 0          | -2.28 | 133  | 0.91 | 3.13 | $1.93 \cdot 10^{-2}$ |
|         | SOE   | 1          | -2.05 | 112  | 0.97 | 2.69 | $1.41 \cdot 10^{-2}$ |
|         | MOE   | 0.77       | -2.73 | 113  | 0.93 | 2.54 | $1.25 \cdot 10^{-2}$ |
|         | m-exp | --         | -2.10 | 87   | 0.98 | 0.69 | $8.60 \cdot 10^{-4}$ |
|         | f-MOE | -1/0.53    | -1.88 | 91   | 0.93 | 2.01 | $7.66 \cdot 10^{-3}$ |
|         |       |            |       |      |      |      |                      |
| MB (P2) | FOE   | 0          | -2.99 | 674  | 0.81 | 4.77 | $4.12 \cdot 10^{-2}$ |
|         | SOE   | 1          | -2.84 | 699  | 0.91 | 3.03 | $1.62 \cdot 10^{-2}$ |
|         | MOE   | 0.99       | -5.20 | 675  | 0.90 | 3.05 | $1.63 \cdot 10^{-2}$ |
|         | m-exp | --         | -2.91 | 570  | 0.92 | 0.49 | $3.88 \cdot 10^{-4}$ |
|         | f-FOE | 0/0.47     | -3.19 | 707  | 1    | 0.55 | $5.10 \cdot 10^{-4}$ |
|         |       |            |       |      |      |      |                      |
| MG (C3) | FOE   | 0          | -3.08 | 826  | 0.93 | 3.91 | $1.71 \cdot 10^{-2}$ |
|         | SOE   | 1          | -2.88 | 764  | 1    | 2.61 | $7.89 \cdot 10^{-3}$ |
|         | MOE   | 0.99       | -5.21 | 729  | 1    | 2.70 | $8.03 \cdot 10^{-3}$ |
|         | m-exp | --         | -3.01 | 710  | 0.99 | 0.30 | $9.70 \cdot 10^{-5}$ |
|         | f-MOE | -1/0.52    | -2.78 | 726  | 1    | 0.62 | $4.23 \cdot 10^{-4}$ |
|         |       |            |       |      |      |      |                      |
| MG (C4) | FOE   | 0          | -2.40 | 173  | 0.97 | 3.01 | $1.19 \cdot 10^{-2}$ |
|         | SOE   | 1          | -2.11 | 129  | 1    | 3.21 | $1.50 \cdot 10^{-2}$ |
|         | MOE   | 0.75       | -2.84 | 154  | 1    | 1.85 | $4.49 \cdot 10^{-3}$ |
|         | m-exp | --         | -2.22 | 116  | 0.99 | 0.35 | $1.57 \cdot 10^{-4}$ |
|         | f-MOE | -1/0.56    | -2.04 | 130  | 1    | 0.88 | $9.84 \cdot 10^{-4}$ |
|         |       |            |       |      |      |      |                      |
| CV (C3) | FOE   | 0          | -3.30 | 1379 | 0.92 | 3.33 | $1.10 \cdot 10^{-2}$ |
|         | SOE   | 1          | -3.12 | 1309 | 1    | 3.06 | $9.63 \cdot 10^{-3}$ |
|         | MOE   | 0.99       | -6.02 | 1279 | 0.99 | 3.19 | $1.04 \cdot 10^{-2}$ |
|         | m-exp | --         | -3.28 | 1311 | 0.98 | 0.32 | $9.50 \cdot 10^{-5}$ |
|         | f-MOE | -1/0.58    | -3.06 | 1365 | 1    | 0.98 | $1.41 \cdot 10^{-4}$ |
|         |       |            |       |      |      |      |                      |
| CV (C4) | FOE   | 0          | -2.81 | 446  | 0.89 | 3.67 | $1.81 \cdot 10^{-2}$ |
|         | SOE   | 1          | -2.67 | 466  | 1    | 1.97 | $5.31 \cdot 10^{-3}$ |
|         | MOE   | 0.99       | -5.55 | 454  | 1    | 2.05 | $5.73 \cdot 10^{-3}$ |
|         | m-exp | --         | -2.77 | 406  | 1    | 0.38 | $1.84 \cdot 10^{-4}$ |
|         | f-MOE | -0.56/0.54 | -2.67 | 415  | 1    | 0.46 | $2.80 \cdot 10^{-4}$ |
|         |       |            |       |      |      |      |                      |
| CV (P1) | FOE   | 0          | -2.31 | 140  | 0.98 | 2.70 | $8.53 \cdot 10^{-3}$ |
|         | SOE   | 1          | -1.98 | 95   | 1    | 4.13 | $2.30 \cdot 10^{-2}$ |
|         | MOE   | 0.62       | -2.59 | 126  | 1    | 2.00 | $4.70 \cdot 10^{-3}$ |
|         | m-exp | --         | -2.12 | 92   | 0.99 | 0.25 | $6.82 \cdot 10^{-5}$ |
|         | f-MOE | -1/0.61    | -1.98 | 111  | 1    | 1.27 | $1.87 \cdot 10^{-3}$ |
|         |       |            |       |      |      |      |                      |
| CV (P2) | FOE   | 0          | -2.74 | 383  | 0.95 | 3.25 | $9.70 \cdot 10^{-3}$ |
|         | SOE   | 1          | -2.51 | 322  | 1    | 2.27 | $5.03 \cdot 10^{-3}$ |
|         | MOE   | 0.86       | -3.43 | 356  | 1    | 1.00 | $9.16 \cdot 10^{-4}$ |

---

|       |            |       |     |      |      |                      |
|-------|------------|-------|-----|------|------|----------------------|
| m-exp | --         | -2.69 | 337 | 0.99 | 0.38 | $1.27 \cdot 10^{-4}$ |
| f-MOE | 0.45/0.773 | -2.99 | 333 | 0.99 | 0.42 | $1.99 \cdot 10^{-4}$ |

---

<sup>1</sup> k: k<sub>1</sub>-FOE, f-FOE and MOE, f-MOE; k<sub>2</sub>-SOE and f-SOE; k<sub>avg</sub>-m-exp; <sup>2</sup> t<sub>0.5</sub> for m-exp is the overall half-time calculated numerically from t<sub>0.5,i</sub> for each of the terms.
